# Supplementary material
Source: publisher site journal article supplement (https://www.dovepress.com/article/367721)
Supplement: Supplementary file 1 [file get_supplementary_file.php]

Supplementary Information

**PAI/MRI Visualization of Tumor Derived Cellular Microvesicles with Endogenous Biopolymer Nanoparticles Modification**

Shuxin Lv 1,🞷

Jinghua Sun 1,🞷

Chunyan Guo 1

Yufei Qin 1

Ruiping Zhang 1

1 The Third Hospital of Shanxi Medical University, Shanxi Bethune Hospital, Shanxi Academy of Medical Sciences, Taiyuan 030032, China

🞷: These authors contributed equally to this work

Correspondence: Ruiping Zhang

Email: zrp_7142@sxmu.edu.cn

**Figure S1.** The size stability of TDMVs+MNP-Gd in in PBS and culture media after 24 h and 48 h incubation .

**Figure S2.** Relative cell viability measurement of H22 cells and CHO cells treated with TDMVs+MNP-Gd at various concentrations.

**Figure S3.** The corresponding MRI signal intensities at various time points in the tumor area.

**Figure S4.** Biodistribution of the TDMVs+MNP-Gd in heart, spleen, lung and tumor after i.v. injection into the tumor bearing mice at various time points as determined by measuring Gd3+ concentrations in tissue lysates using ICP-MS.
